# Supplementary material
Source: PubMed Central journal article supplement (PMC7927312)
Supplement: NIHMS1673066-supplement-Supplemetnary_Information.pdf [file NIHMS1673066-supplement-Supplemetnary_Information.pdf]

## Supplementary Information

**Table 1. Mouse lines**

| Mouse Line                              | Origin               | Stock Number |
|-----------------------------------------|----------------------|--------------|
| Vgat Cre ( <i>Slc32a1-IRES-Cre</i> )    | Jackson              | 016962       |
| Vglut1 Cre ( <i>Slc17a7-IRES-Cre</i> )  | Jackson              | 023527       |
| Vglut2 Cre ( <i>Slc17a6-IRES-Cre</i> )  | Jackson              | 028863       |
| Vglut3 Cre ( <i>Slc17a8-iCre</i> )      | Jackson              | 018147       |
| Chat Cre ( <i>Chat-IRES-Cre</i> )       | Jackson              | 006410       |
| ePet Cre ( <i>Fev-Cre</i> )             | Jackson              | 012712       |
| Th Flp ( <i>Th-2A-Flpo</i> )            | Poulin et al. (2018) |              |
| Vgat lox/lox ( <i>Slc23a1 lox/lox</i> ) | Jackson              | 012897       |

**Table 2. Injection coordinates** (mm relative to bregma)

| Region             | X    | Y          | Z    |
|--------------------|------|------------|------|
| PFC (2 injections) | 0.35 | +1.4, +2.1 | 2.0  |
| NAc Core           | 1.0  | +1.4       | 4.25 |
| NAc medial shell   | 0.5  | +1.25      | 4.6  |
| NAc lateral shell  | 1.75 | +1.4       | 4.5  |
| Dorsal striatum    | 1.5  | +0.75      | 3.0  |
| VP                 | 1.8  | +0.4       | 5.3  |
| LS                 | 0.5  | +0.5       | 3.25 |
| BNST               | 0.8  | +0.4       | 4.2  |
| MPO                | 0.4  | 0          | 5.1  |
| LPO                | 1.0  | +0.25      | 5.1  |
| LH (GABA)*         | 1.0  | -1.25      | 4.8  |
| LH (glutamate)*    | 1.0  | -0.6       | 4.9  |
| VTA                | 0.5  | -3.25      | 4.25 |
| RMTg               | 0.5  | -4.25      | 4.25 |
| PPTg               | 1.2  | -4.5       | 3.75 |
| DR                 | 0    | -5.0       | 3.0  |
| LDTg               | 0.5  | -5.0       | 3.25 |
| LC                 | 0.9  | -5.45      | 4.0  |

\*See Methods for details on LH injection coordinates

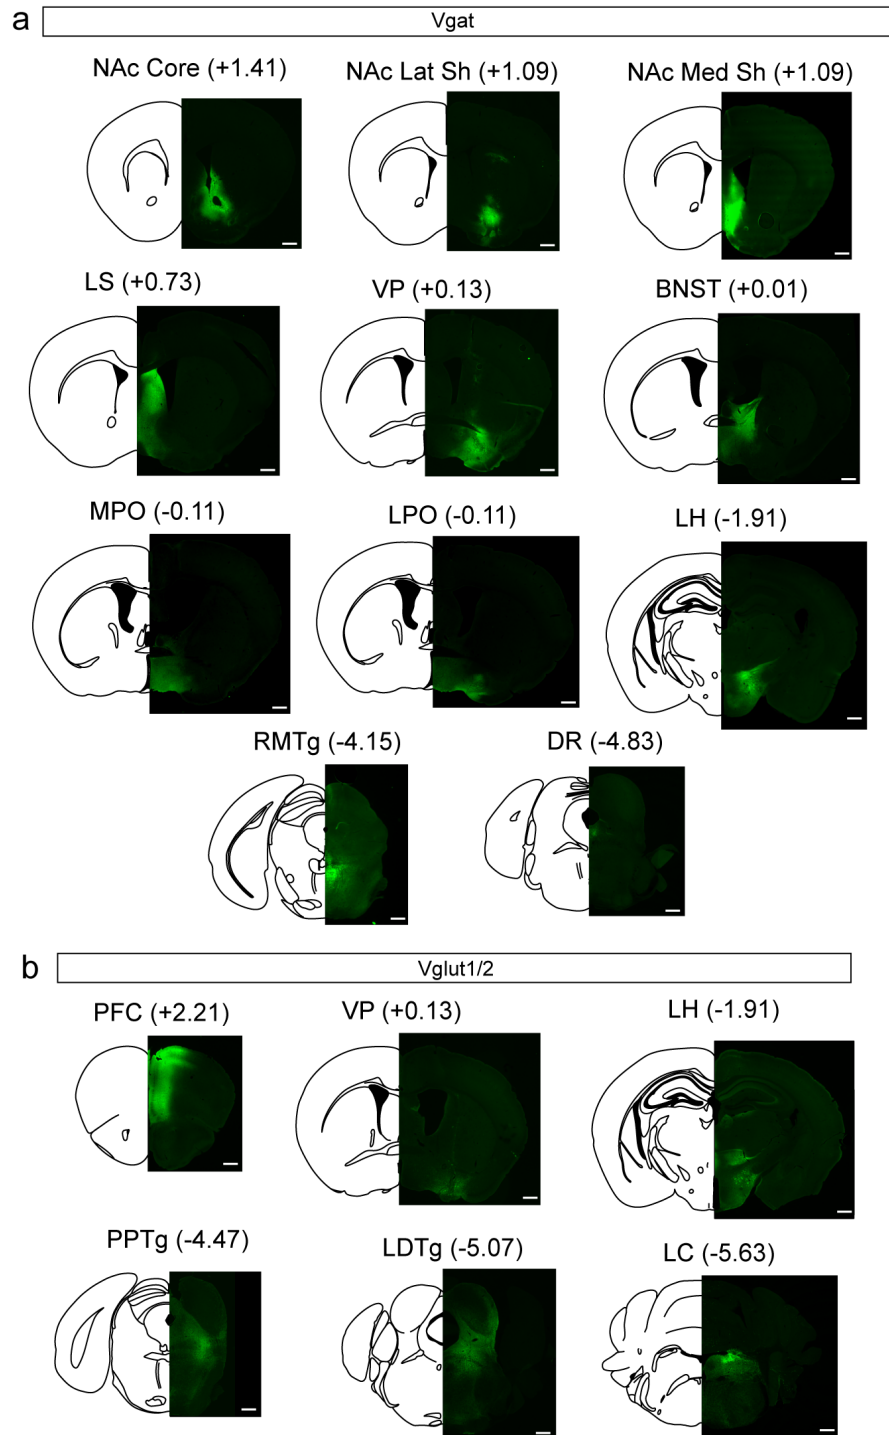

**Supplementary Figure 1.** Representative images of AAV-FLEX-synaptophysin-GFP injection sites in Vgat **(a)** and Vglut **(b)** mice from designated areas. Numbers indicate distance from bregma. Scale bars = 500  $\mu$ m.

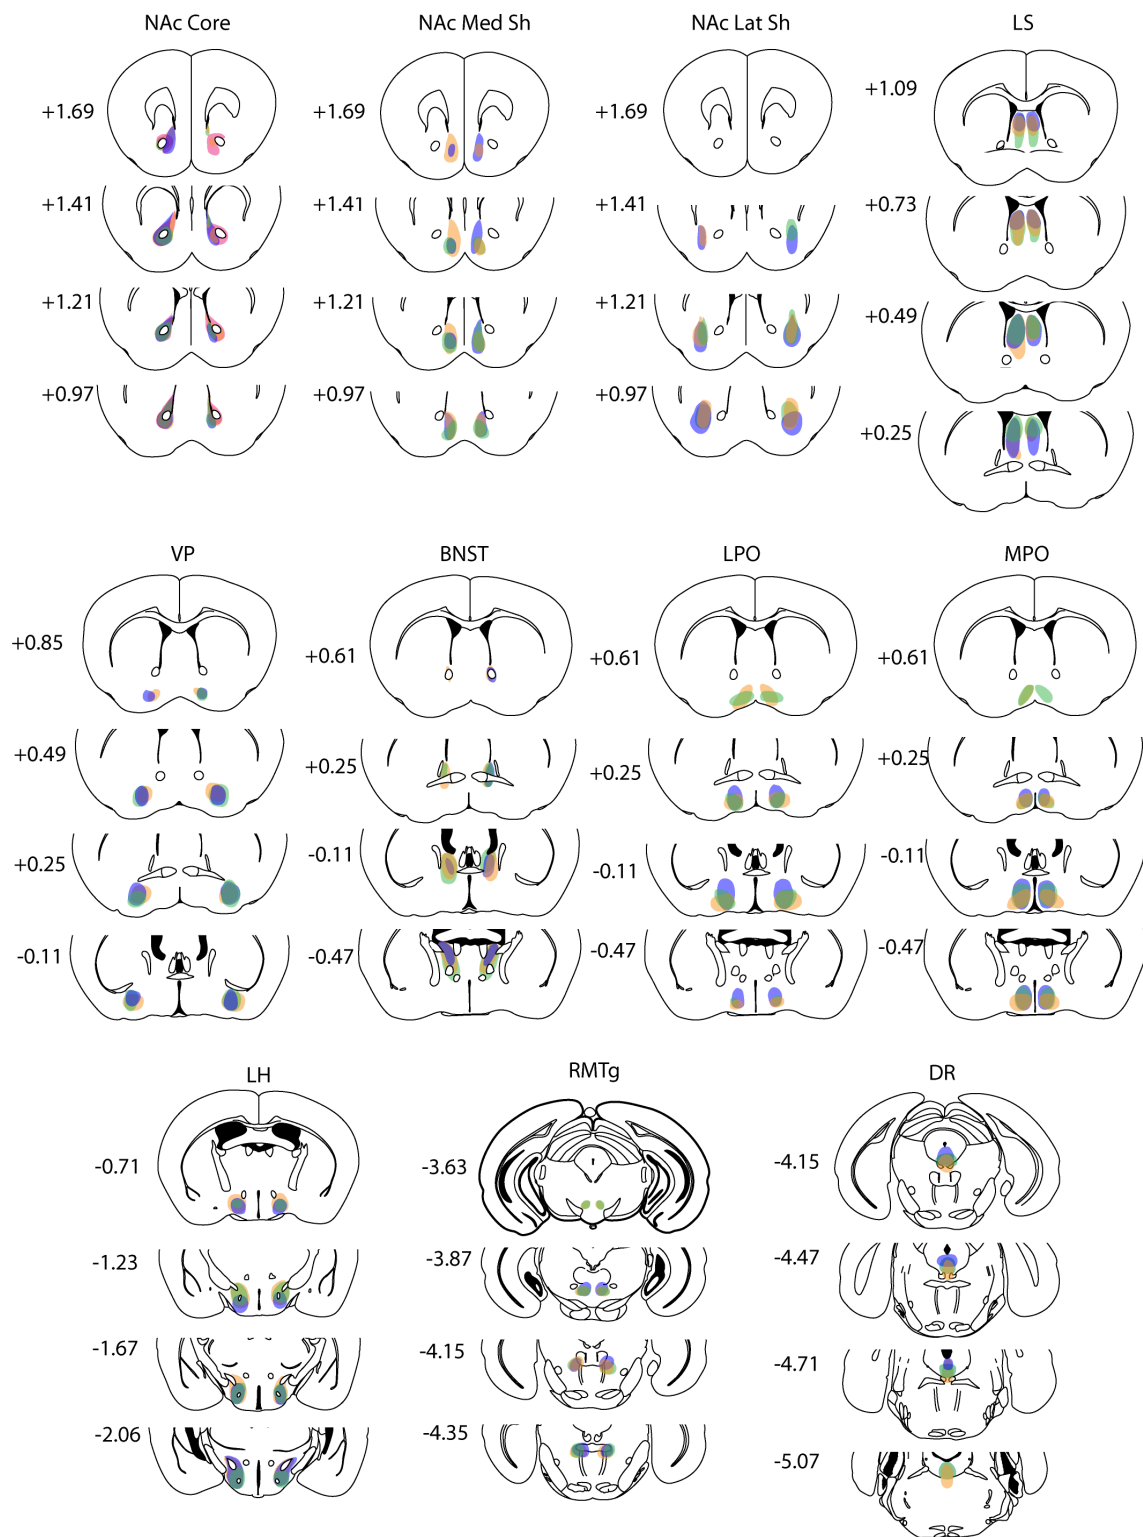

**Supplementary Figure 2.** Maps illustrating viral spread at injection site for synaptophysin mapping in Vgat cre mice. Each color represents an individual animal and numbers indicate distance from bregma.

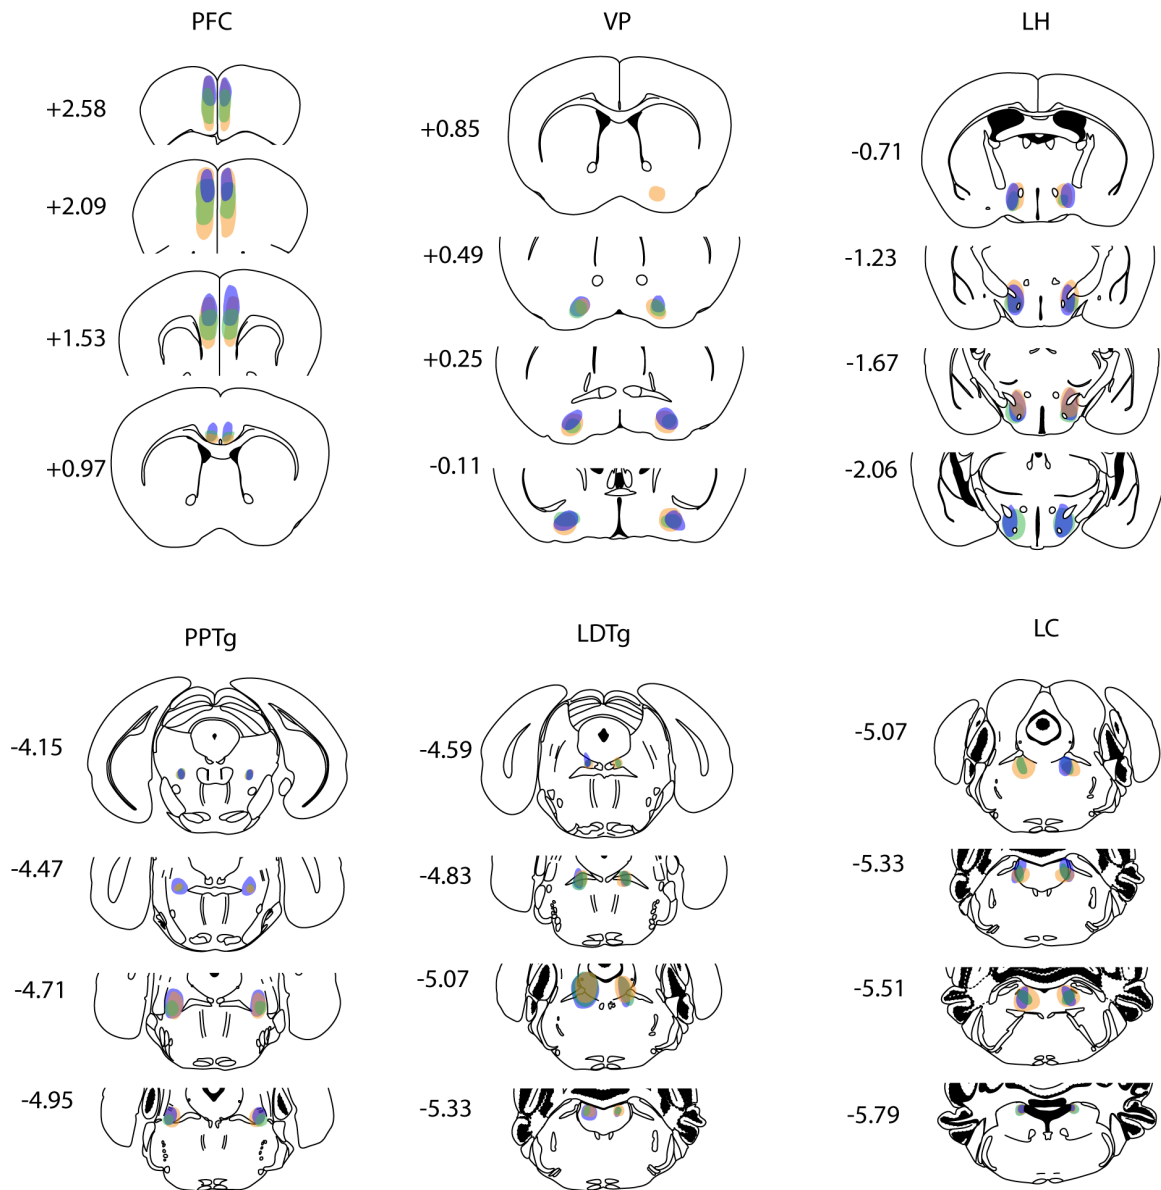

**Supplementary Figure 3.** Maps illustrating viral spread at injection site for synaptophysin mapping in Vglut cre mice. Each color represents an individual animal and numbers indicate distance from bregma.

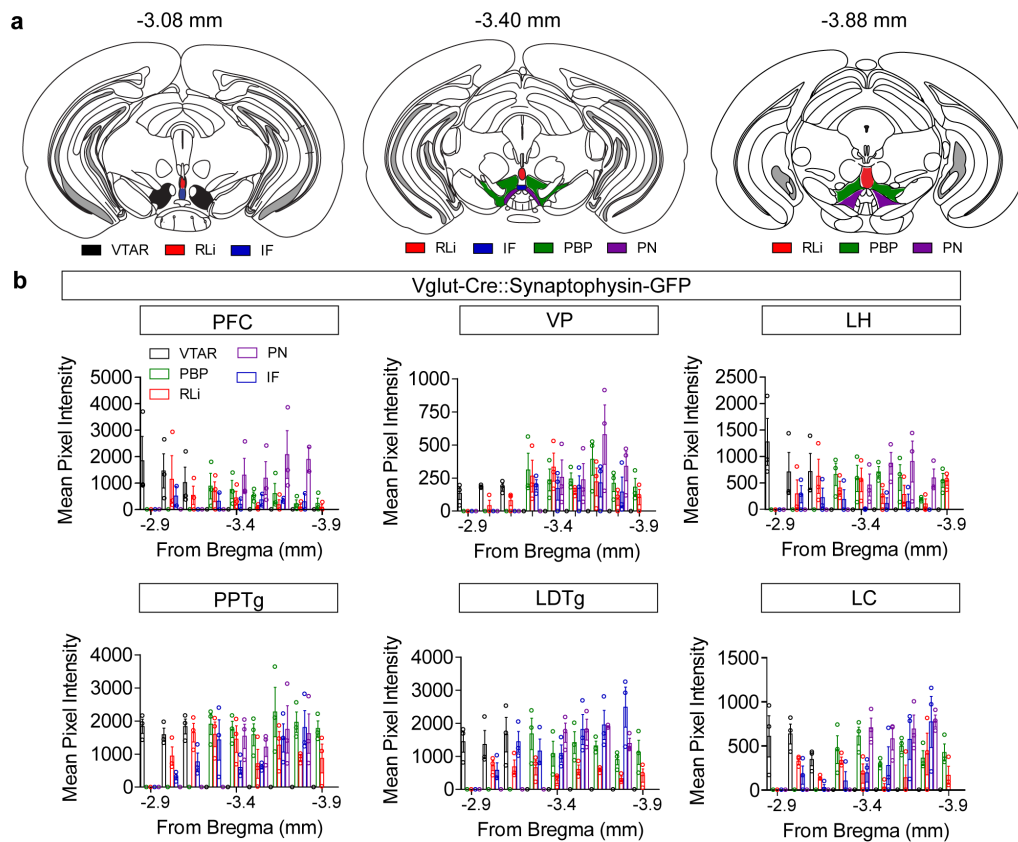

**Supplementary Figure 4 (a)** Atlas images (adapted from<sup>25</sup>) defining the rostral VTA (VTAR), rostromedial nucleus (RLi), interfascicular nucleus (IF), parabrachial pigmented nucleus (PBP) and paranigral (PN) subdivisions of the VTA. **(b)** Mean pixel intensity (arbitrary units) of GFP fluorescence in each subdivision following injection of synaptophysinGFP into the indicated region in Vglut1 or Vglut2 Cre mice. N=3 mice/group. Error bars represent s.e.m.

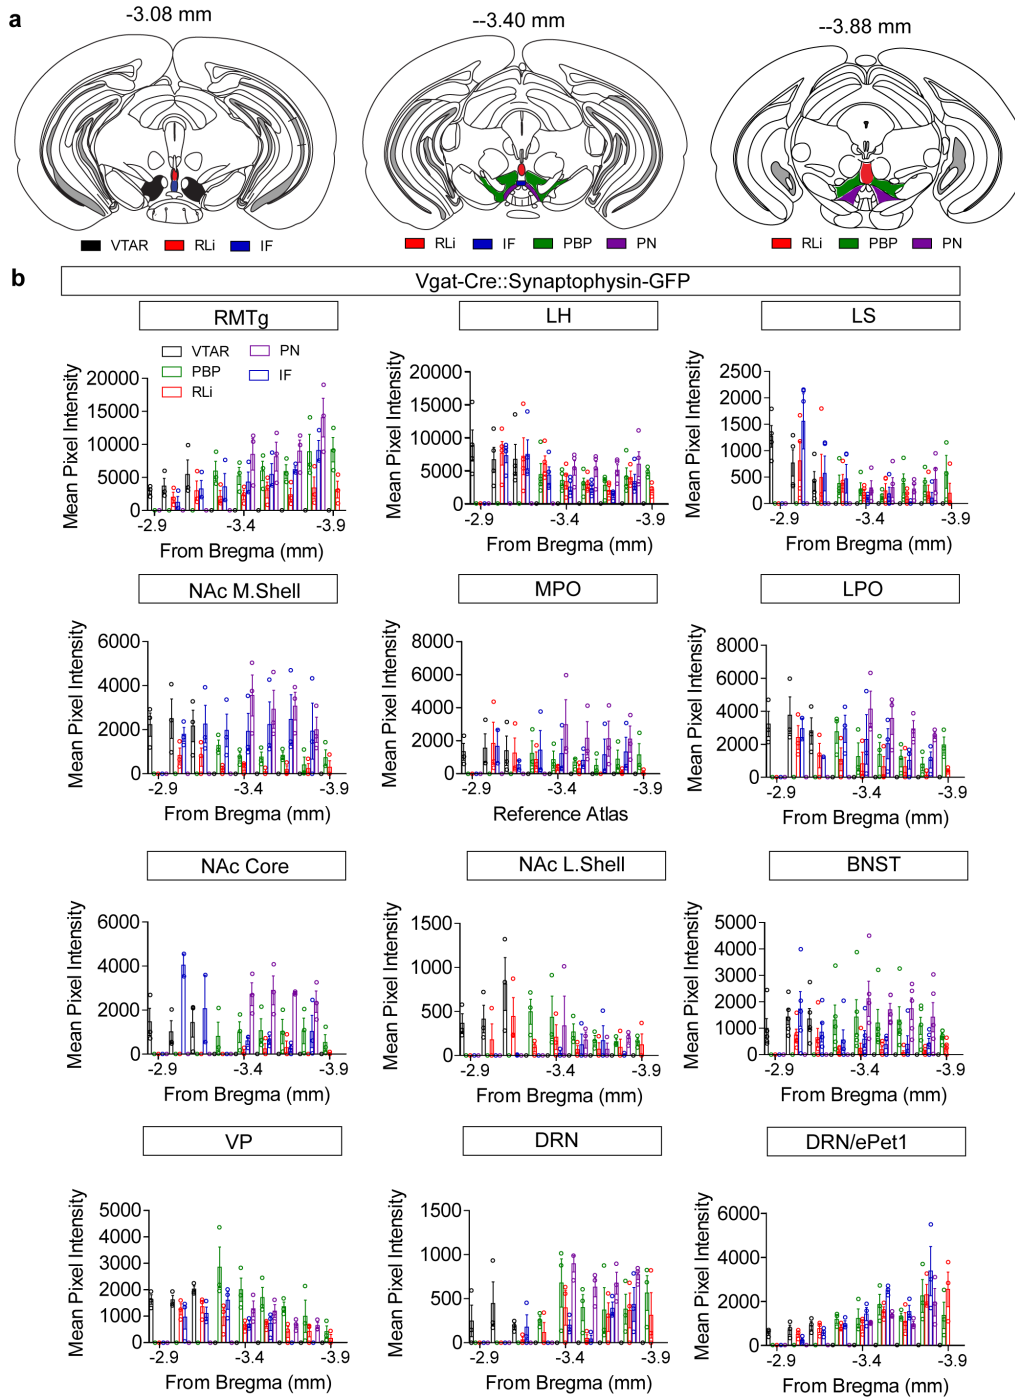

**Supplementary Figure 5. (a)** Atlas images (adapted from<sup>25</sup>) defining the rostral VTA (VTAR), rostral linear nucleus (RLi), interfascicular nucleus (IF), parabrachial pigmented nucleus (PBP) and paranigral (PN) subdivisions of the VTA. **(b)** Mean pixel intensity (arbitrary units) of GFP fluorescence in each subdivision following injection of synaptophysinGFP into the indicated region in Vgat-Cre mice or ePet1-Cre mice (last panel). N=3 mice/group for all regions except n=4 for LS, NAc Core, and BNST. Error bars represent s.e.m

Chr2-YFP

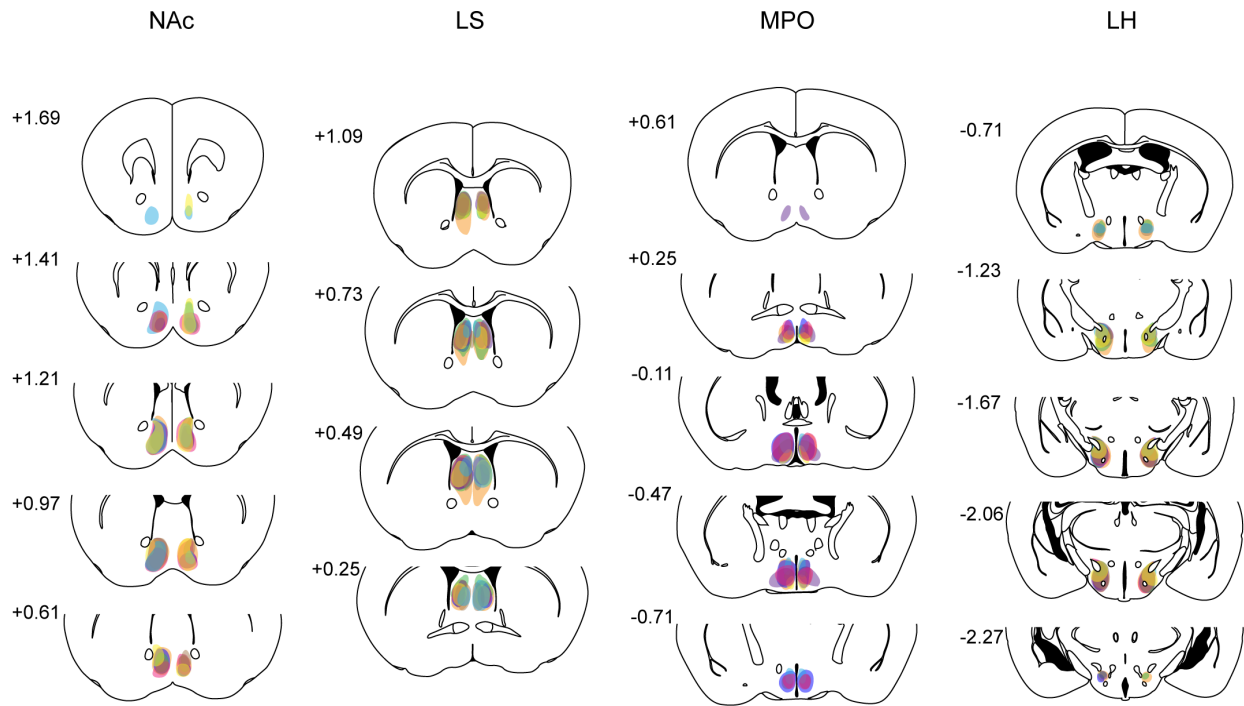

Jaws-GFP

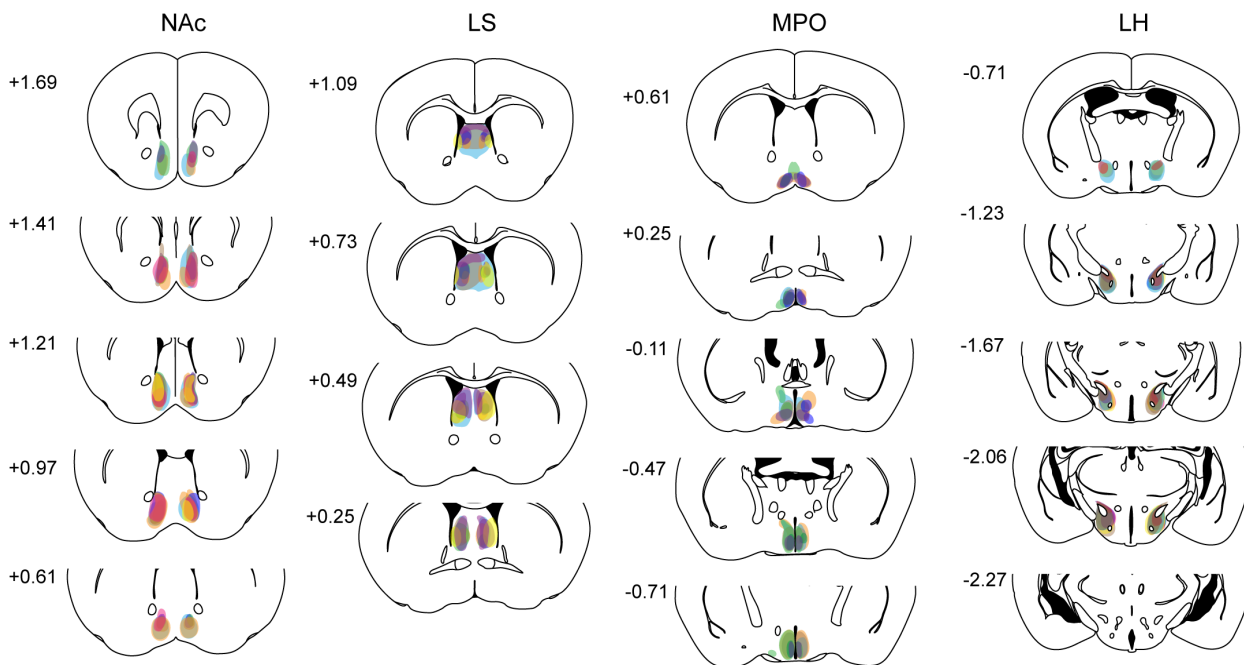

**Supplementary Figure 6.** Maps illustrating viral spread at injection site for Chr2-YFP and Jaws-GFP in Vgat cre mice. Each color represents an individual animal and numbers indicate distance from bregma.

## ChR2

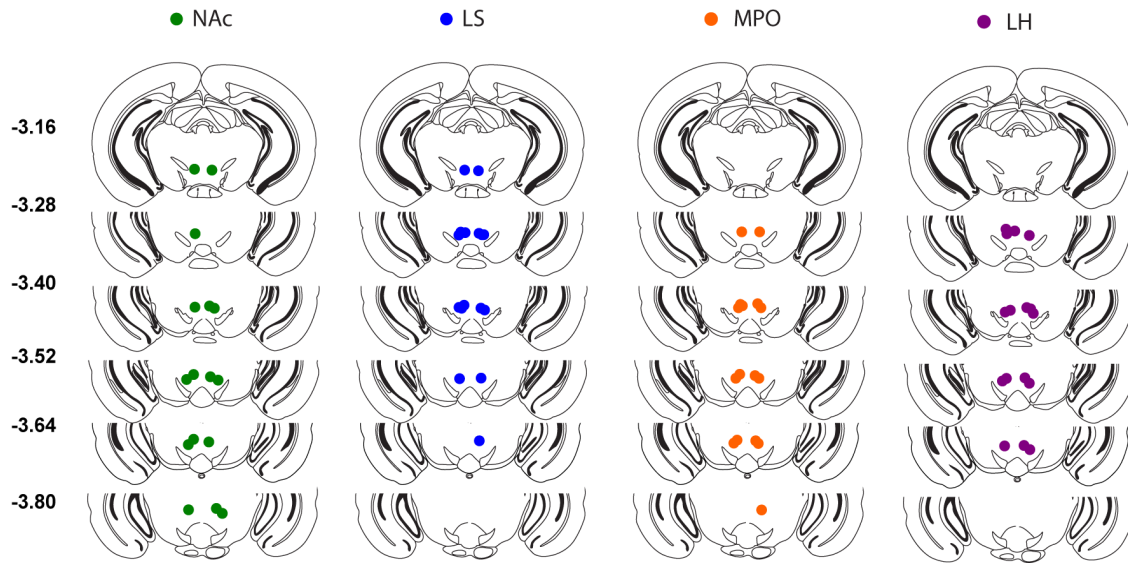

## Jaws

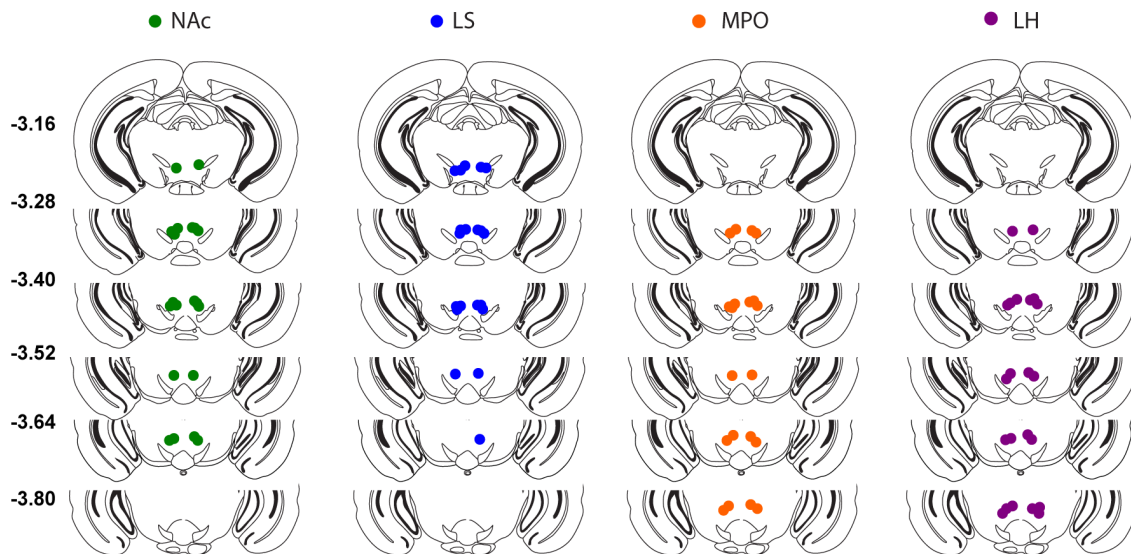

**Supplementary Figure 7.** Maps indicating fiber optic placement in mice injected with ChR2 or Jaws.
